# Supplementary material
Source: publisher figshare collection journal article supplement (https://gsajournals.figshare.com/ndownloader/files/16709252)
Supplement: Supplementary file 1 [file 16709252]

**SUPPLEMENTARY TABLES**

Supplementary Table 1.

| **Line** | **Treatment** | **Hours post inoculation** | **Included/not included in WGCNA** |
| --- | --- | --- | --- |
| B14A | Water | 8 | No |
| B14A | Water | 8 | Yes |
| B14A | Water | 8 | Yes |
| B14A | Water | 15 | Yes |
| B14A | Water | 15 | Yes |
| B14A | Water | 15 | No |
| B14A | CMN | 0 | Yes |
| B14A | CMN | 0 | Yes |
| B14A | CMN | 0 | Yes |
| B14A | CMN | 8 | Yes |
| B14A | CMN | 8 | Yes |
| B14A | CMN | 8 | Yes |
| B14A | CMN | 15 | Yes |
| B14A | CMN | 15 | Yes |
| B14A | CMN | 15 | Yes |
| N551 | Water | 8 | Yes |
| N551 | Water | 8 | Yes |
| N551 | Water | 8 | Yes |
| N551 | Water | 15 | Yes |
| N551 | Water | 15 | No |
| N551 | Water | 15 | Yes |
| N551 | CMN | 0 | No |
| N551 | CMN | 0 | Yes |
| N551 | CMN | 0 | Yes |
| N551 | CMN | 8 | Yes |
| N551 | CMN | 8 | Yes |
| N551 | CMN | 8 | Yes |
| N551 | CMN | 15 | Yes |
| N551 | CMN | 15 | Yes |
| N551 | CMN | 15 | Yes |

Supplementary Table 2.

| **GO term** | **Description** | **p-value** | **FDR** |
| --- | --- | --- | --- |
| GO:0032774 | RNA biosynthetic process | 0.00032 | 0.012 |
| GO:0051252 | regulation of RNA metabolic process | 0.00022 | 0.012 |
| GO:0006355 | regulation of transcription, DNA-dependent | 0.00021 | 0.012 |
| GO:0006351 | transcription, DNA-dependent | 0.00032 | 0.012 |
| GO:0031326 | regulation of cellular biosynthetic process | 0.0017 | 0.024 |
| GO:0045449 | regulation of transcription | 0.0015 | 0.024 |
| GO:0019219 | regulation of nucleobase, nucleoside, nucleotide and nucleic acid metabolic process | 0.0016 | 0.024 |
| GO:0010468 | regulation of gene expression | 0.0018 | 0.024 |
| GO:0009889 | regulation of biosynthetic process | 0.0017 | 0.024 |
| GO:0051171 | regulation of nitrogen compound metabolic process | 0.0017 | 0.024 |
| GO:0010556 | regulation of macromolecule biosynthetic process | 0.0017 | 0.024 |
| GO:0031323 | regulation of cellular metabolic process | 0.002 | 0.025 |
| GO:0016070 | RNA metabolic process | 0.0022 | 0.025 |
| GO:0080090 | regulation of primary metabolic process | 0.0025 | 0.026 |
| GO:0060255 | regulation of macromolecule metabolic process | 0.0027 | 0.027 |
| GO:0019222 | regulation of metabolic process | 0.003 | 0.028 |
| GO:0006350 | transcription | 0.0032 | 0.028 |
| GO:0006807 | nitrogen compound metabolic process | 0.0053 | 0.045 |
| GO:0003700 | transcription factor activity | 3.80E-05 | 0.0016 |
| GO:0030528 | transcription regulator activity | 0.00099 | 0.02 |

Supplementary Table 3.

| **Gene name** | **Description** |
| --- | --- |
| GRMZM2G368698 | LOC100286362 |
| GRMZM5G853245 | nucleic acid binding protein |
| GRMZM5G883417 | acyl-desaturase |
| GRMZM2G109201 | LOC100281158 |
| GRMZM5G892774 | hypothetical protein LOC100384339 |
| GRMZM2G170969 | protease inhibitor/seed storage/LTP family protein |
| GRMZM2G122846 | G-box-binding factor 1 (LOC100284009), mRNA |
| GRMZM2G038152 | hypothetical protein LOC100384701 |
| GRMZM2G305446 | Aquaporin TIP3-1 (Tonoplast intrinsic protein 3-1)(ZmTIP3-1)(ZmTIP3;1) |
| GRMZM2G380377 | DRE-binding protein 4 |
| GRMZM2G103013 | hypothetical protein LOC100277850 |
| AC217293.3_FG007 | hypothetical protein LOC100304375 |
| GRMZM2G419994 | wound induced protein |
| GRMZM2G133331 | Putative uncharacterized protein |
| GRMZM2G069082 | hypothetical protein LOC100272507 |
| GRMZM2G474755 | polcalcin Jun o 2 |
| GRMZM2G156365 | hypothetical protein LOC100280212 |
| GRMZM2G042756 | dehydration-responsive element-binding protein 1D |
| GRMZM2G389070 | hypothetical protein LOC100277691 |
| GRMZM2G390436 | RING-H2 finger protein ATL5A |
| GRMZM2G006964 | gibberellin 2-beta-dioxygenase 7 |
| GRMZM2G098696 | heat shock factor protein 7 |
| GRMZM2G149024 | transferase, transferring glycosyl groups |
| AF546187.1_FG011 | Cytochrome P450 CYP81N4 |
| GRMZM2G080191 | hypothetical protein LOC100383760 |
| GRMZM2G146163 | chaperone protein dnaJ 20 |
| GRMZM2G105364 | GAST1 protein |
| GRMZM2G026910 | LOC100284567 |
| AF546188.1_FG005 | Zein-alpha A20 Precursor (19 kDa zein A20) |
| GRMZM2G355572 | LOC100280483 |
| GRMZM2G129399 | copper ion binding protein |
| GRMZM2G020054 | hypothetical protein LOC100278463 (LOC100278463), mRNA |
| GRMZM2G092813 | acyl-activating enzyme 11 |
| GRMZM2G430646 | hypothetical protein LOC100193824 |
| GRMZM2G046618 | Putative uncharacterized protein |
| GRMZM2G096412 | hypothetical protein LOC100193798 |
| GRMZM2G143747 | hypothetical protein LOC100381926 |
| GRMZM2G172450 | hypothetical protein LOC100193017 |
| GRMZM2G116603 | F-box domain containing protein |
| GRMZM2G069126 | sbCBF6 |
| GRMZM2G074097 | Thiazole biosynthetic enzyme 1-2, chloroplastic Precursor |
| GRMZM2G148908 | hypothetical protein LOC100217218 |
| GRMZM2G086123 | hypothetical protein LOC100191796 |
| GRMZM2G431030 | hypothetical protein LOC100304009 |
| GRMZM2G059964 | cortical cell-delineating protein |
| GRMZM2G179049 | NAC domain-containing protein 18 |
| GRMZM2G382345 | protein binding protein |
| GRMZM2G425728 | early light-inducible protein ELIP (LOC541918), mRNA |
| GRMZM2G010474 | hypothetical protein LOC100381709 |
| GRMZM2G100543 | hypothetical protein LOC100384219 |
| GRMZM2G322917 | hypothetical protein LOC100277625 |
